## **Microcapsuled entomopathogenic fungus against fire ants**

Hua-Long Qiu\*<sup>1</sup>, Eduardo G P Fox<sup>2</sup>, Dan-Yang Zhao<sup>1</sup>, Jin-Zhu Xu<sup>1</sup>, Chang-Sheng Qin<sup>1</sup>

1- Guangdong Provincial Key Laboratory of Silviculture, Protection and Utilization /  
Guangdong Academy of Forestry, Guangzhou 510520, P.R.China

2- Fire Ant Research Centre, South China Agricultural University, Guangdong, P.R.China

\*Author for correspondence: Hua-Long Qiu

Phone: +86 18520608671

E-mail: hlqiu@sinogaf.cn

## Abstract

A new microencapsulation method of *Metarhizium anisopliae* based on gelatin (GE) and gum arabic (GA) is presented. Conditions to produce spheres 35-50  $\mu\text{m}$  relied on 1% wall material, GE:GA ratio 1:1–1:2, core:wall ratio 1:1, under pH 4.0, 35-50°C and 500-700 r/min agitation. Microcapsulation provided protection against UV and longer shelf life as compared to unencapsulated conidia. The obtained preparation proved active against the red imported fire ant *Solenopsis invicta*.

## 1. Introduction

Widespread crop use of toxic chemical insecticides has been a top concern among developing countries over the past decades (Ecobichon, 2001). Pesticides will imbalance and contaminate ecosystems, while spawning insecticidal-resistant populations (Whalon et al., 2008). The recent accelerated economic growth of People's Republic of China had a heavy toll on the environment (WWF, 2016), and now nationals are yearning for better environmental conditions and improved safety regulation on internal goods (Song and Woo, 2008). As a result, there are solid governmental efforts to limit and/or reduce the use of chemical pesticides, such as encouraging sustainable technologies (Wang, 2017).

One established sustainable method to control insect pests is through the use of entomopathogenic fungi (Jaber and Ownley, 2017; Skinner et al., 2014). Most commonly employed fungi are *Metarhizium spp.* and *Beauveria bassiana* (Shah and Pell, 2003). Such fungi invade the integument of insect body via spores that grow hyphae into the body cavity, absorbing fluids and destroying internal organs and tissues (Roy et al., 2006). The species *M. anisopliae* can infect a wide range of insect species that is mainly employed in controlling soil pests (Krueger and Roberts, 1997; Schwarz, 1995). However, conidia preparations of *M. anisopliae* are UV-sensitive and have a short shelf life (Falvo et al., 2016; Marcos et al., 2009; Shah and Pell, 2003), which restricts large-scale production and distribution. New formulations of entomopathogenic fungi conidia are therefore an urgent necessity.

Microencapsulation is a protective process where core active materials are physically coated (Jin and Dan, 2011; Jyothi et al., 2010).

Microencapsulation methods have been extensively applied to improve pesticides, foods, enzymes, bait pheromones, where wall materials applied in a micrometric scale can effectively improve the stability of bio-active substances, as well as regulate their release (Eratte et al., 2014, Gu et al., 2010, Leefong and Cheesian, 2013, Opende Koul, 2011).

The microencapsulation formulation method known as ‘complex coacervation’ works via relatively physically gentle mechanisms of electrostatically-charged polyelectrolytes (de Kruijff et al., 2004). It is particularly effective for making microcapsules of oily organic pesticides inside gelatin (GE) and gum arabic (GA) as wall materials (Eratte et al., 2014).

The literature on microencapsulation of *M. anisopliae* by complex coacervation is scarce. On a previous publication Liu and Liu (2008) tested several protocols of liquid phase coating to microencapsulate conidia of *M. anisopliae* MA126, using a range of coating materials. The authors obtained promising results (Liu and Liu, 2008), however some technical difficulties were observed, e.g. conidia did not disperse into the oil carrier, resulting in less protection to desiccation and ultraviolet radiation exposure. We herein present a novel preparation of microcapsules of *M. anisopliae* conidia obtained with an improved methodology, resulting in enhanced UV-resistance, storage life, and insecticidal activity tested against the red imported fire ant.

## 2. Materials and methods:

### 2.1. Fungal culture

We isolated the highly virulent strain of *M. anisopliae* ‘M09’ from Australian soil samples (Qiu *et al.* 2014). Isolated conidia were cultured in 9-cm wide Petri dishes containing Potato-Dextrose Agar medium (200 g/L potato, 20 g/L dextrose and 20 g/L agar) held at  $25 \pm 2$  °C and relative humidity of  $75 \pm 5$  % for 8 days. The conidia were carefully brushed off and suspended in either 0.05% Tween-20 (i.e. controls) or dimethicone (for microencapsulation). Conidia concentrations were measured using a haemocytometer (Shanghai Qiu Jing biochemical reagent Instrument Co., Ltd.). Viability of obtained conidia was tested prior to experiments, and most of the conidia of *M. anisopliae* ‘M09’ on the surface of *S. invicta* could germinate and formed infection pegs to penetrate the ant cuticle (Fig. 1).

### 2.2. General microcapsule preparation process

The employed methodology (summarized in Fig. 2) was based on the same principle of polyelectrolyte complexation as in Liu and Liu (2008), but with fundamental modifications. Background tests towards design our protocol are described in Supplementary Materials of file 1. In details, 150 mL GE (type A, with an isoelectric point between Ph 7-9) and GA solutions 2% (w/v) are prepared and mixed 1:1. The mixture is stirred for 10 min at 500 r/min until a uniform mix is obtained, and held in a 40°C water bath to prevent gel solidification. Core material (‘M09’ conidial powder) and dimethicone 1:20 (wt/wt) were then added, and gently mixed emulsified with a High-Shear Homogenizer at 10,000 r/min for 15 min at room temperature, towards obtaining a stable suspension of uniformly sized dimethicone micelles.

This emulsion was stirred at 500 r/min in water bath temperature increased to 45 °C. As temperature stabilised the system was left stirring and pH was adjusted to 4.0 with 10% acetic, leading to complex coacervation. Coacervation was allowed to continue for 10–15 min, when temperature was lowered to 10°C. The pH was re-adjusted to 9 with 10% NaOH. Finally, wall material was fixed with 25% glutaraldehyde. Mix was centrifuged with 3000 r/min for 5 min, and supernatant was discarded. The gel microcapsules at the bottom of the centrifuge tube were washed with distilled water to remove remaining glutaraldehyde. Recovered microcapsules were held at 40°C under 0.1 MPa of vacuum in a vacuum freeze-drying machine (Shanghai Far East Pharmaceutical Machinery Co., Ltd.) until they reached a constant weight as tracked with a scales.

### 2.3. UV-susceptibility of microcapsules

Microcapsules and crude *M. anisopliae* conidia were simultaneously exposed to 15 watts UV lamps at 250 nm for 3h, and then slowly dissolved in PBS pH 7.4 for 2.5 hours, towards obtaining stable suspensions. The obtained conidial suspensions were cultured on a shaking table set to  $25 \pm 1^\circ\text{C}$  and 120 r/min for 6 h. Germination rates of conidia were obtained to probe for UV-susceptibility of each sample. Experiment was replicated three times.

### 2.4. Shelf life of microencapsulated conidia

Microcapsules and crude conidial preparations were stored at  $25 \pm 1^\circ\text{C}$  and dry conditions with  $30 \pm 5\%$  RH. Samples of each preparation were taken at 0, 1, 2, and 3 months, and dissolved in PBS pH 7.4 towards obtaining conidial suspensions and cultured as above described, to obtain germination rates. Experiment was replicated three times.

### 2.5. Insecticide activity bioassay

Colonies of *S. invicta* were excavated from Guangdong Academy of Forestry, Guangzhou, China (23.200036N, 113.369204E), separated from soil as described in Banks et al. (1981), and transferred to plastic boxes (50 cm × 40 cm × 15 cm) rimmed with talcum powder. Ants were fed with *Tenebrio molitor* larvae and 25 % sucrose water every two days, and held in the dark in an incubator at  $25 \pm 1^\circ\text{C}$  and  $80 \pm 5\%$  humidity.

To determine toxicity microcapsules powder was mixed with sand to *S. invicta* media workers ( $1.15 \pm 0.1$  mm head width). Sand was sieved through a mesh size 18, from which 20 g of screened sand were placed in a plastic box (6 × 10 cm) with 8 ml distilled water and mixed different amounts of microcapsule powder: 0, 2, 4, 6, or 8 g. After which sixty workers of uncontrolled age were simultaneously placed in the boxes, and held in the dark incubator at  $25 \pm 1^\circ\text{C}$  and 85 % relative humidity. The mortality of workers was recorded once a day for seven days. Experiment was replicated three times.

## 2.6. Statistical analysis

Numeric results were analysed using RStudio v.1.1.456 using non-parametric statistics (raw data and scripts available as a Supplementary File 2). Germination rates and final mortality of ants were evaluated by Kruskal-Wallis followed by Dunn's test for statistical significance at alpha 0.05, using R package "dunn.test". Plots were generated with packages "reshape2" and "ggplot2", a fluxogram was generated with "DiagrammeR". R scripts with comments are available as a Supplementary file.

## 3. Results

### 3.1. General microcapsule preparation process

Details regarding the optimisation of the presented encapsulation protocol are discussed in Supplementary Materials of file 1. A rough estimation using the described haemocytometer was made on the number of conidia within the mixture at the beginning of the encapsulation process (ca.  $3.84 \times 10^{10}$  conidia) and finally unencapsulated conidia ( $8.12 \times 10^9$  conidia), yielding an estimated % of encapsulation of 78.9% conidia.

### 3.2. UV-resistance of microcapsules

The germination rates of microencapsulated conidia were significantly higher than those of bare conidia following 3 h of UV exposure (Figure 3A; p-value: 0.0156). Germination rates were equivalent in non-exposed controls (p-value: 0.1034). Exposure to UV did not affect the germination of microencapsulated conidia (p-value: 0.3832).

### 3.3. Shelf life of microencapsulated conidia

Germination rates over storage months are illustrated in Figure 3B. The viability of bare conidial preparations steadily decreased over the storage period, whilst the viability of microencapsulated preparation was evidently more stable. In fact, while the mean germination rates of microencapsulated samples decreased sensibly over each month, the overall decrease was statistically negligible (refer to obtained p-values in the Supplementary File).

### 3.4. Insecticidal activity bioassay

Figure 4 illustrates the mean survival curves of *S. invicta* media workers following exposure to different amounts of microencapsulated conidial preparations. Efficiency was evaluated from final obtained rates, where the dose of 4 g was stronger than 2g (p-value: 0.0102) but not significantly different from 6 g (p-value: 0.0494) or 8 g (p-value: 0.1623).

## 4. Discussion and conclusion

The employed M09 strain was selected for having demonstrated rapid infection against

*Coptotermes formosan*, *S. invicta*, *Spodoptera litura* caterpillars in a previous investigation (Qiu et al., 2014b). The viability of the isolated sample was tested prior to present experiments (exemplified in Fig. 1). Most of the conidia on the surface of *S. invicta* could germinate and formed infection pegs to penetrate the host cuticle.

Our novel method of encapsulation (Fig. 2) resulted in a conidial preparation which was more resistant than reported for preparations obtained with different protocols by Liu and Liu (2008). Compared to crude conidial preparations, the microencapsulated conidia were more stable after UV exposure and longer-lasting (Figure 3). Microencapsulated preparation also proved effectively lethal against red imported fire ants (Figure 4) at doses > 4 g per 30 worker ants.

We believe there are three possible explanations for why the process of microcapsulation was able to enhance the stress resistance of conidia. (i) Compared to other methods of microencapsulation (e.g. spray drying) complex coacervation employs gentler temperatures (Bae and Lee, 2008). Thus, likely conidia are preserved throughout the encapsulation process. (ii) The bioactive core is surrounded by a continuous layer of complexed GE:GA, isolating conidia from oxygen, UV radiation, desiccation (Mayya et al., 2003, Zhang et al., 2009). (iii) Dimethicone as a carrier works well with fungal conidia because it is atoxic and temperature-resistant (Filbry et al., 2014). Such factors taken together might be among the reasons for which the obtained microcapsules performed better than bare conidia overall. The methods described by Liu and Liu (2008) had the disadvantage that conidia did not embed into the oil emulsion, thus leaving them exposed to external stress agents.

The described microencapsulation method thus can reduce the necessary quantity of conidial required for field application from shielding conidia from environmental stress. Estimated encapsulation rates of conidia were high (ca. 80%) but further more accurate data are needed to confirm the efficiency relative to other current methods.

## References

- Bae, E.K., Lee, S.J., 2008. Microencapsulation of avocado oil by spray drying using whey protein and maltodextrin. *J Microencapsul.* 25 (8), 549-561.
- Banks, W.A., Lofgren, C.S., Jouvenaz, D.P., Stringer, C.E. et al. 1981. Techniques for collecting, rearing, and handling imported fire ants. USDA-SEA, AATS-S-21.
- de Kruif, C.G., Weinbreck, F., de Vries, R., 2004. Complex coacervation of proteins and anionic polysaccharides. *Curr. Opin. Colloid In.* 9 (5), 340-349.
- Ecobichon, D.J., 2001. Pesticide use in developing countries. *Toxicology* 160 (1), 27-33.
- Eratte, D., Wang, B., Dowling, K., Barrow, C.J. Adhikari, B.P., 2014. Complex coacervation with whey protein isolate and gum arabic for the microencapsulation of

- omega-3 rich tuna oil. *Food Funct.* 5 (11), 2743-2750.
- Falvo, M.L., Pereira-Junior, R.A., Rodrigues, J., López Lastra, C.C., García, J.J., Fernandes, K.K., Luz, C., 2016. UV-B radiation reduces in vitro germination of *Metarhizium anisopliae* s.l. but does not affect virulence in fungus-treated *Aedes aegypti* adults and development on dead mosquitoes. *J. Appl. Microbiol.* 121 (6), 1710-1717.
- Filbry, A., Zelle, D., Kröpke, R., 2014. Water-in-oil emulsion used to treat skin aging, comprises cetyl polyethylene glycol/polypropylene glycol-10/1 dimethicone and/or emulsifiers based on low viscosity sebacates, non-polar lipids and/or low naphthenic mineral oils. DE102012214234[P].
- Gu, X.L., Zhu, X., Kong, X. Z., Tan, Y., 2010. Comparisons of simple and complex coacervations for preparation of sprayable insect sex pheromone microcapsules and release control of the encapsulated pheromone molecule. *J. Microencapsul.* 27 (4), 355-364.
- Jaber, L.R., Ownley, B.H., 2017. Can we use entomopathogenic fungi as endophytes for dual biological control of insect pests and plant pathogens? *Biol. Control* 242107, 50-59.
- Ji, X., Dan, C., 2011. Microencapsulating aerial conidia of trichoderma harzianum through spray drying at elevated temperatures. *Biol. Control* 56(2), 202-208.
- Jyothi, N.V.N., Prasanna, P.M., Sakarkar, S.N., Prabha, K.S. et al. 2010. Microencapsulation techniques, factors influencing encapsulation efficiency. *J. Microencapsul.* 27 (3), 187-197.
- Krueger, S.R., Roberts, D.W., 1997. Soil treatment with entomopathogenic fungi for corn rootworm (*Diabrotica* spp.) larval control. *Biol. Control* 9(1), 67-74.
- Lacey, L.A., Shapiroilan, D. I., 2008. Microbial control of insect pests in temperate orchard systems: potential for incorporation into IPM. *Annu. Rev. Entomol.* 53 (1), 121-144.
- Leefong, S., Cheesian, O., 2013. Effect of pH on garlic oil encapsulation by complex coacervation. *J. Food Process Technol.* 4 (1), 234-241.
- Liu, C.P., Liu, S.D., 2008. Formulation and characterization of the microencapsulated entomopathogenic fungus *Metarhizium anisopliae* MA126. *J. Microencapsul.* 25 (5), 377-384.
- Marcos, F., Anne, H., Stephenp, W., 2009. Imbibitional damage in conidia of the entomopathogenic fungi *Beauveria bassiana*, *Metarhizium acridum*, and *Metarhizium anisopliae*. *Biol. Control* 51(3), 346-354.
- Mayya, K.S., Bhattacharyya, A., Argillier, J.F., 2003. Micro-encapsulation by complex coacervation: influence of surfactant. *Polym. Int.* 52 (4), 644-647.
- Opender Koul, O. (2011) Microbial biopesticides: opportunities and challenges. *CAB Reviews: Perspectives in Agriculture, Veterinary Science, Nutrition and Natural Resources* 6 (56).
- Qiu, H.L., Lu, L.H., Zhang, C.Y., He, Y. R., 2014a. Pathogenicity of individual isolates of



- entomopathogenic fungi affects feeding preference of red imported fire ants *Solenopsis invicta*. *Biocontrol Sci. Tec.* 24 (11), 1286-1296.
- Qiu, H.L., Lu, L.H., Shi, Q.X., He, Y.R., 2014b. Fungus exposed *Solenopsis invicta* ants benefit from grooming. *Journal of Insect Behavior*, 27 (5), 678-691.
- Schwarz, M.R., 1995. *Metarhizium anisopliae*, for soil pest control. ACS Symposium Series.
- Roy, H.E., Steinkraus, D.C., Eilenberg, J., Hajek, A.E. Pell, J.K., 2006. Bizarre interactions and endgames: entomopathogenic fungi and their arthropod hosts. *Annu. Rev. Entomol.* 51 (1), 331.
- Shah, P.A., Pell, J.K., 2003. Entomopathogenic fungi as biological control agents. *Appl. Microbiol. Biot.* 61 (5-6), 413.
- Li, S., Wang, Z.Y., 2014. Study on the preparation of *Beauveria bassiana* microcapsules by complex coacervation. *J. Anhui Agr. Sci.* 29,10179-10182.
- Skinner, M., Parker, B.L., Kim, J.S., 2014. Role of entomopathogenic fungi in integrated pest management. in: Abrol, D.P. (Ed.), *Integrated pest management- current concepts and ecological perspective*, Academic Press, USA, pp. 169-191
- Song, L., Woo, W. (Eds.), 2008. *China's Dilemma: Economic growth, the environment and climatechange*. ANU Press. Retrieved from <http://www.jstor.org/stable/j.ctt24h83c>.
- Wang, R., Wan F., Li, B., 2017. Roles of Chinese Government on Prevention and Management of Invasive Alien Species in: Wan, Fanghao, Jiang, Mingxing, Zhan, Aibin (eds) *Biological invasions and its management in China*, Vol. 1. Springer.
- Whalon M.E., Mota-Sanchez D., Hollingworth R.M., editors. *Global pesticide resistance in arthropods*. Oxfordshire, UK: CABI; 2008.
- WWF. *Living Planet Report 2015: development, species, ecological civilization* (WWF International, Gland, Switzerland, 2014).
- Zhang, Y., Wang, L.F., Pan, S.Y., 2009. Study on the double-layer microencapsulation of vanillin by complex coacervation and edible oil. *Sci. Tec. Food Ind.* 30 (11), 295257-258.



Figure 1. Electron micrograph of bare conidia of *Metarhizium anisopliae* M09 germinating on the thorax surface of red imported fire ants *Solenopsis invicta*, media worker, ca. 12 h following exposure.

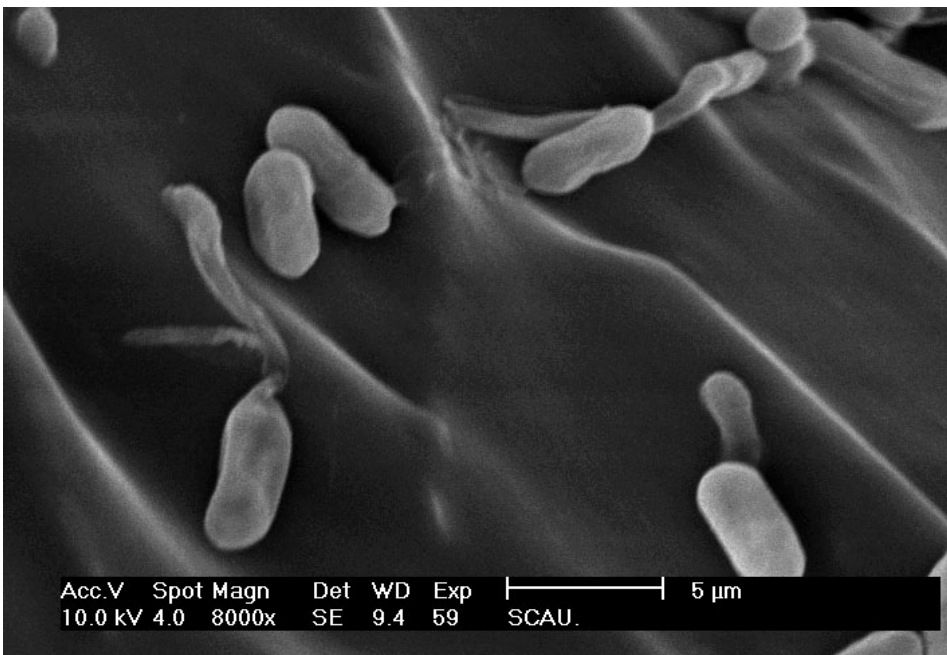

Figure 2. Process for preparation of *Metarhizium anisopliae* conidia spherical microcapsules sized 35-50  $\mu\text{m}$  via complex coacervation method. Preliminary tests leading to the present optimised protocol are discussed in Supplementary Materials.

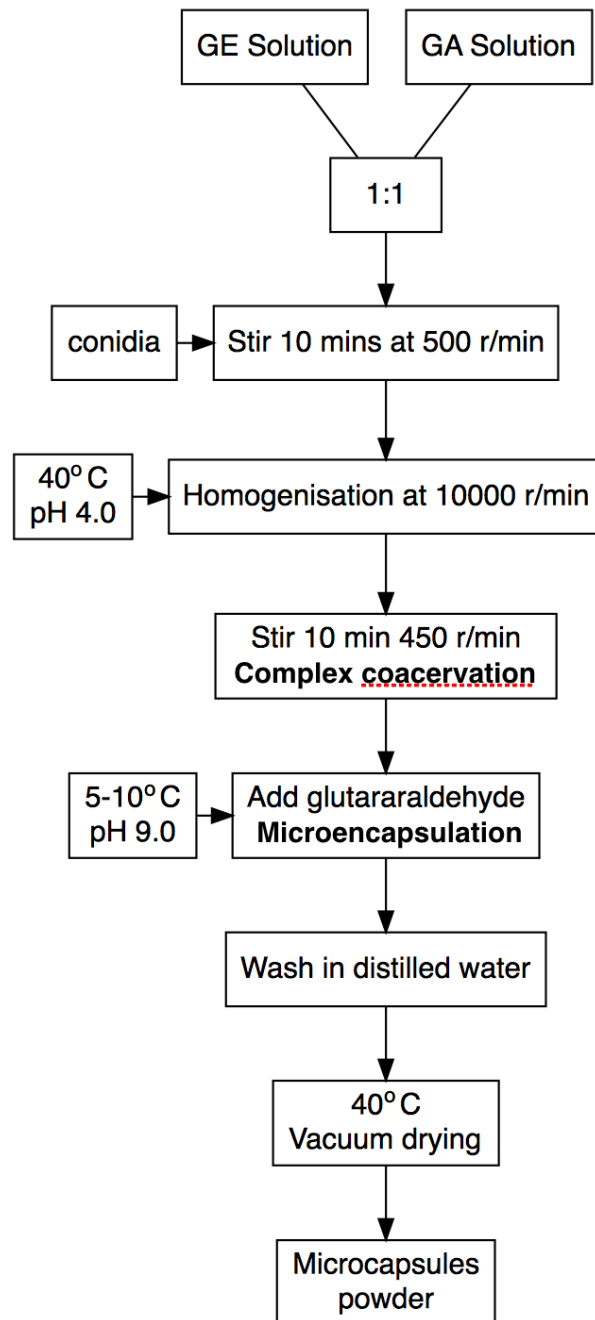

Figure 3. Germination rates of bare and microencapsulated conidia following (A) UV irradiation (- = no exposure; + = 2 h exposure); (B) different storage times in days 317 after conidial preparation (products stored at 25°C as described in Methods). Statistics: In the plots the square □ represents the median, and vertical bars are min–max interval (n = 4). Results within each experiment were compared jointly by nonparametric Kruskal-Wallis followed by Dunn's multiple comparison test; p-values > 0.05 were considered non-significantly (ns) different, and p-values < 0.05 were considered statistically different (\*). Individual values and R plotting scripts included in Supplementary Materials.

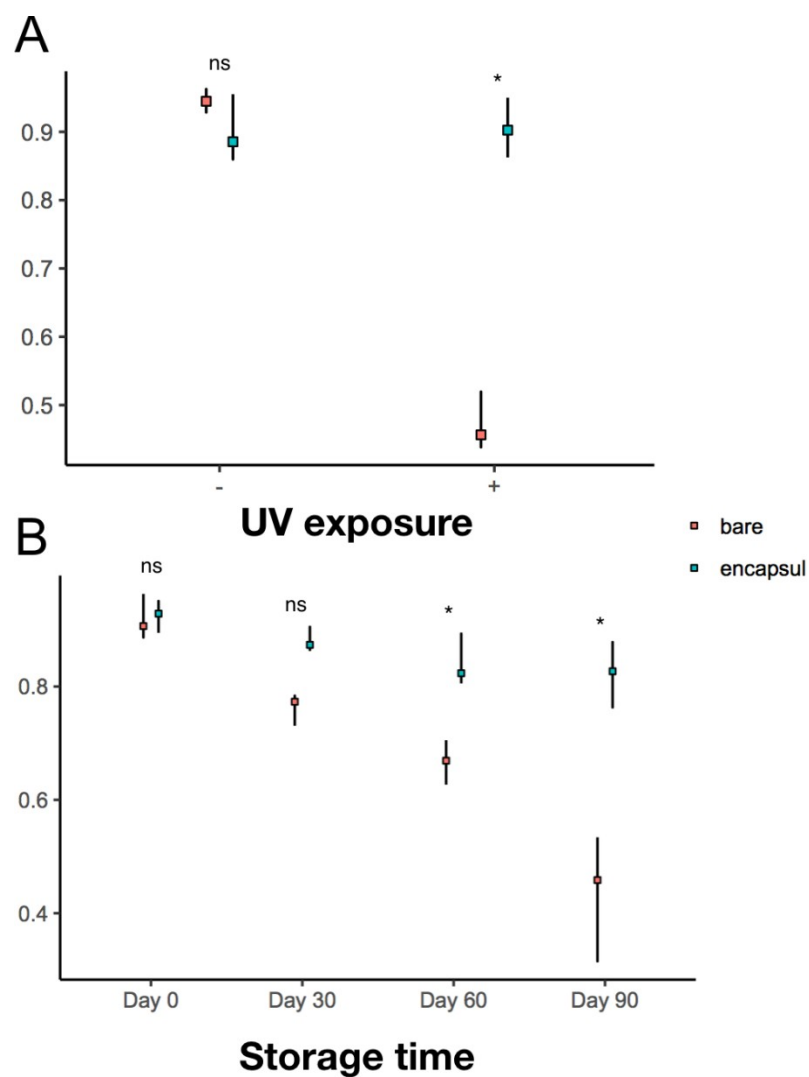

Figure 4. Survival curves (in days) of 30 media workers ( $n = 3$ ) of the red imported fire ant *Solenopsis invicta* following exposure to different amounts of microencapsulated conidia of *Metarhizium anisopliae* prepared via the complex coacervation method depicted in Fig. 2. Individual values and R plotting scripts included in Supplementary Materials.

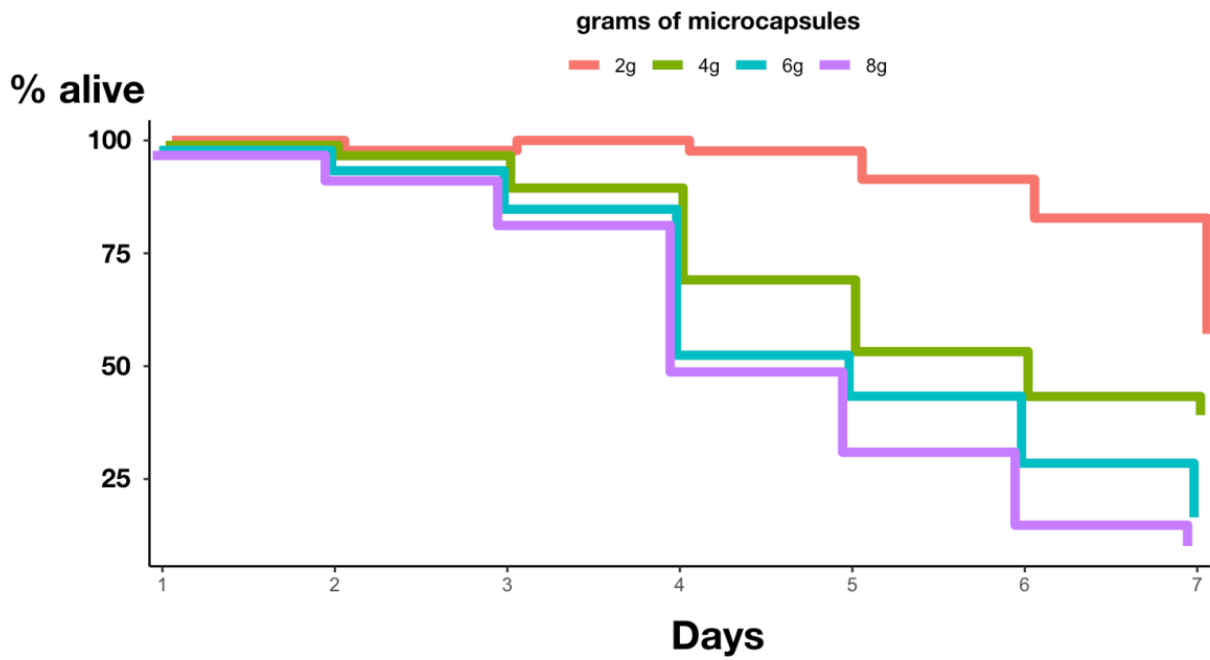

Source: https://www.biorxiv.org/content/biorxiv/early/2018/12/26/505370.full.pdf
